# Supplementary material for: Construction of NiCo2O4@graphene nanorods by tuning the compositional chemistry of metal–organic frameworks with enhanced lithium storage properties
Source: Royal Society of Chemistry journal article supplement (doi:10.1039/c8ta07967f), 2018-01-01
Supplement: c8ta07967f1.pdf [file c8ta07967f1.pdf]

# **Construction of NiCo<sub>2</sub>O<sub>4</sub>@graphene Nanorods by Tuning the Compositional Chemistry of Metal Organic Frameworks with Enhanced Lithium Storage Properties**

Zhiqing Jia,<sup>a,b</sup> Yingbin Tan,<sup>\*a</sup> Zhonghui Cui,<sup>a</sup> Linlin Zhang<sup>a</sup> and Xiangxin Guo<sup>\*ac</sup>

<sup>a</sup> State Key Laboratory of High Performance Ceramics and Superfine Microstructure, Shanghai Institute of Ceramics, Chinese Academy of Sciences, Shanghai 200050, China. \*Email: [tanyingbin1986@126.com](mailto:tanyingbin1986@126.com); [xxguo@mail.sic.ac.cn](mailto:xxguo@mail.sic.ac.cn)

<sup>b</sup> University of Chinese Academy of Sciences, Beijing 100039, China. of Sciences, Beijing 100039, China.

<sup>c</sup> College of Physics, Qingdao University, Qingdao 266071, China.

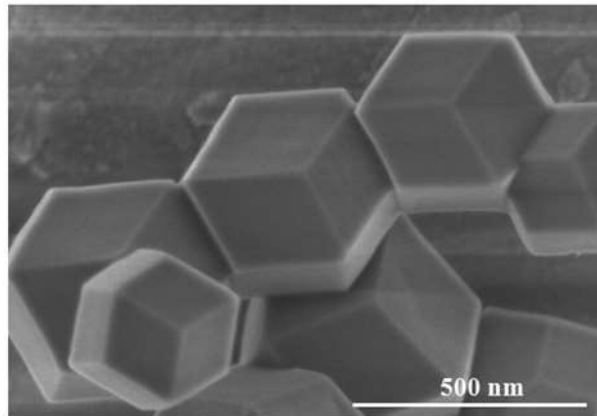

**Fig. S1** SEM image of ZIF-67 precursor.

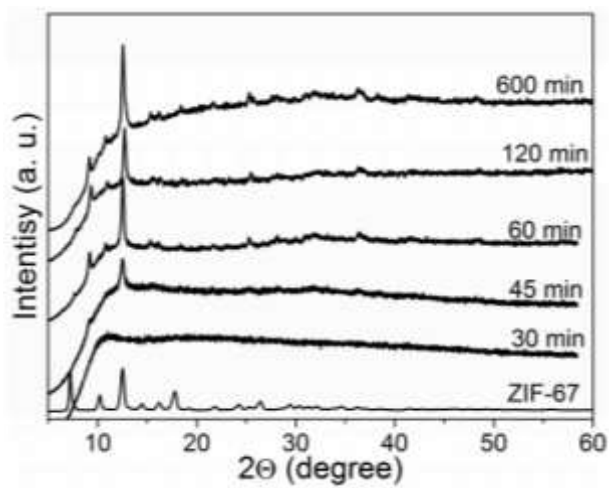

**Fig. S2** XRD patterns of ZIF-67@Ni-BTC obtained with reaction time of 30 min, 45min, 60 min, 120 min and 600 min.

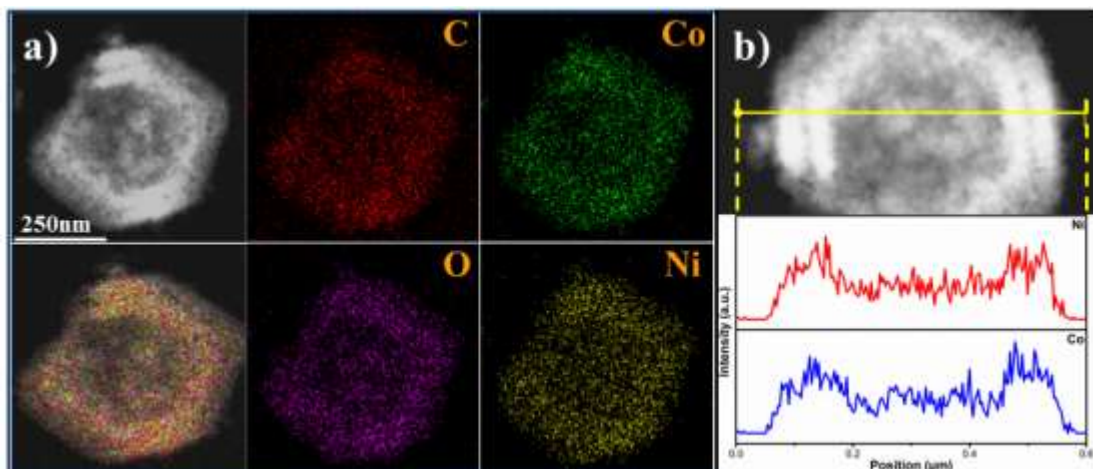

**Fig. S3** a) STEM and Elemental mapping images and b) Line profiling analysis of the ZIF-67@Ni-BTC with reaction time of 10 min.

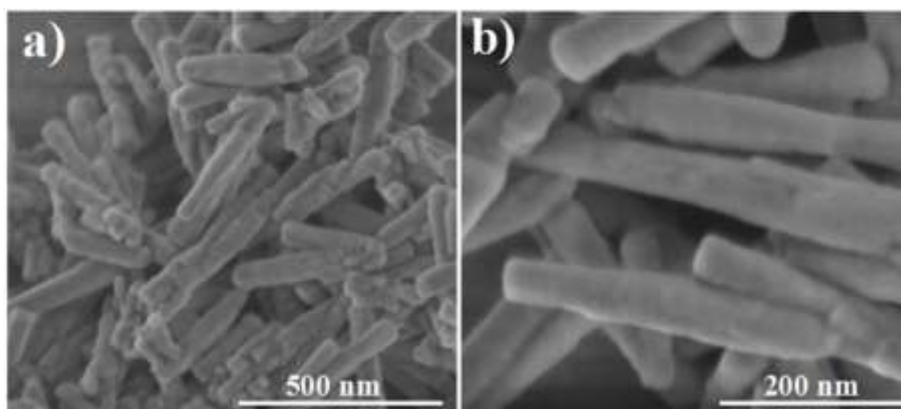

**Fig. S4** SEM images of ZIF-67@Ni-BTC nanorods.

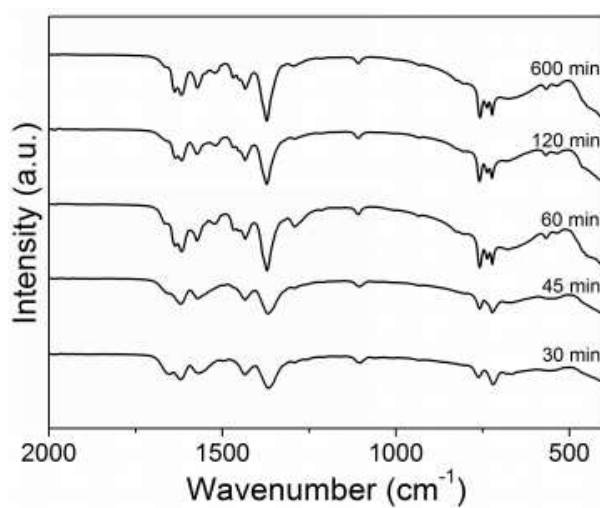

**Fig. S5** FTIR patterns of ZIF-67@Ni-BTC obtained with reaction time of 30 min, 45min, 60 min, 120 min and 600 min.

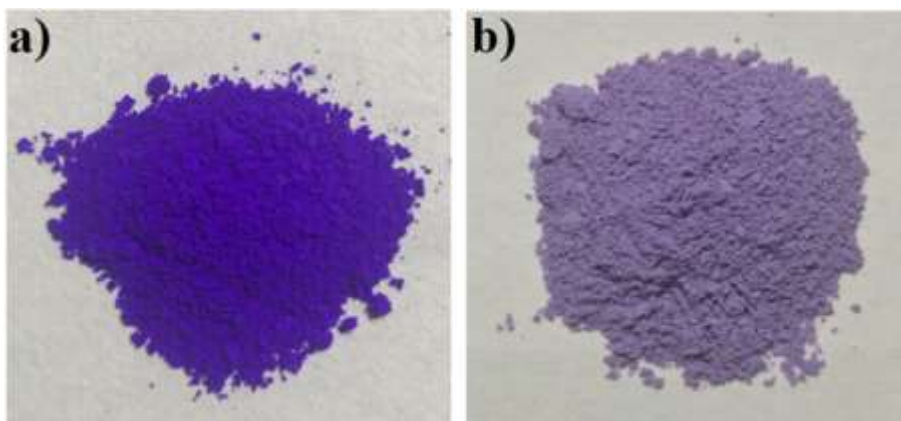

**Fig. S6** The photos of a) ZIF-67 and b) ZIF-67@Ni-BTC nanorods.

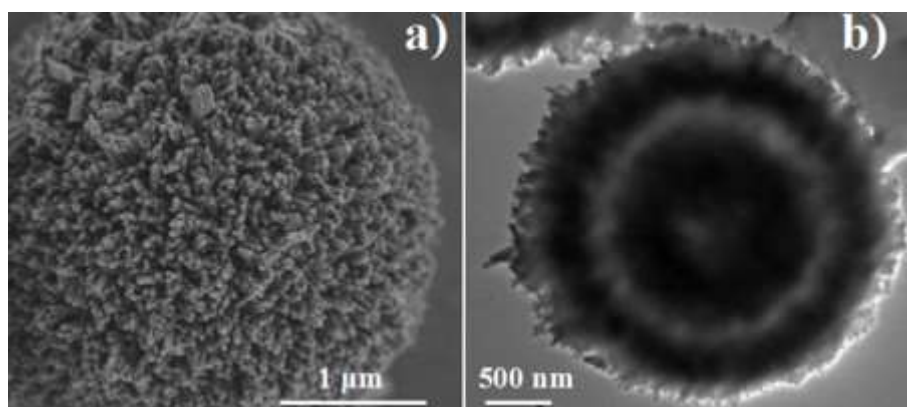

**Fig. S7** a) SEM and b) TEM images of NiCo-BTC.

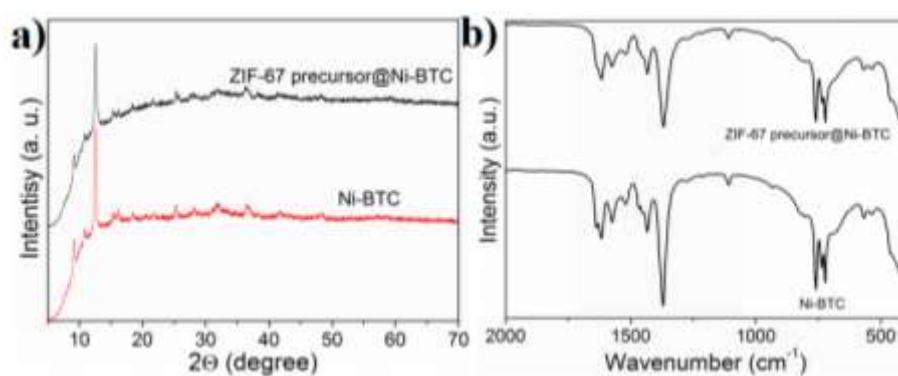

**Fig. S8** a) XRD and b) FTIR patterns of ZIF-67@Ni-BTC nanorods and Ni-BTC.

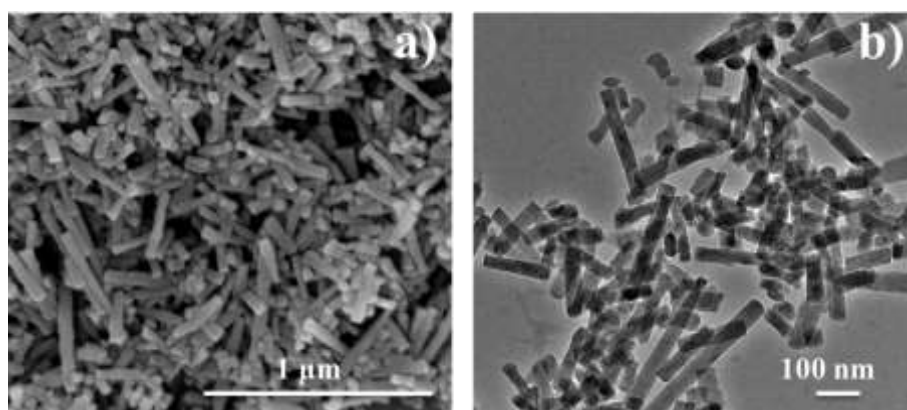

**Fig. S9** a) SEM and b) TEM images of ZIF-67@Ni-BTC nanorods with the presence of ZIF-67's precursors (cobalt nitrate and 2-methylimidazole) and nickel nitrate and BTC.

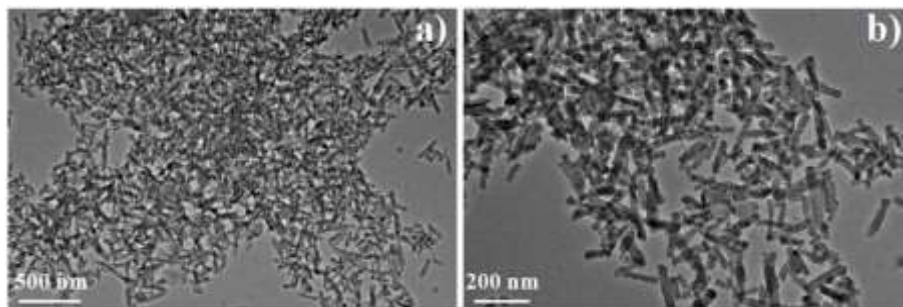

**Fig. S10** TEM images of ZIF-67@NiCo-BTC.

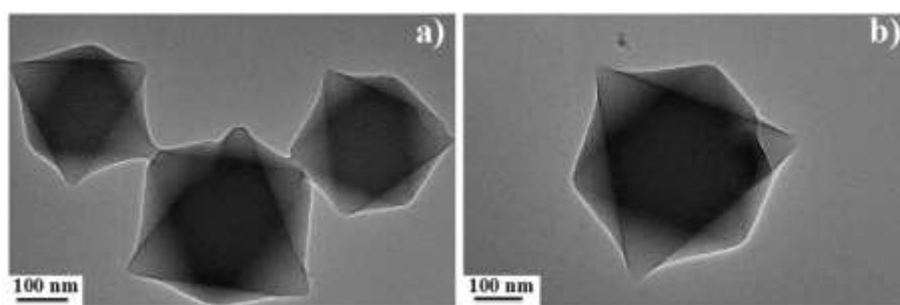

**Fig. S11** TEM images of ZIF-67@Cu-BTC.

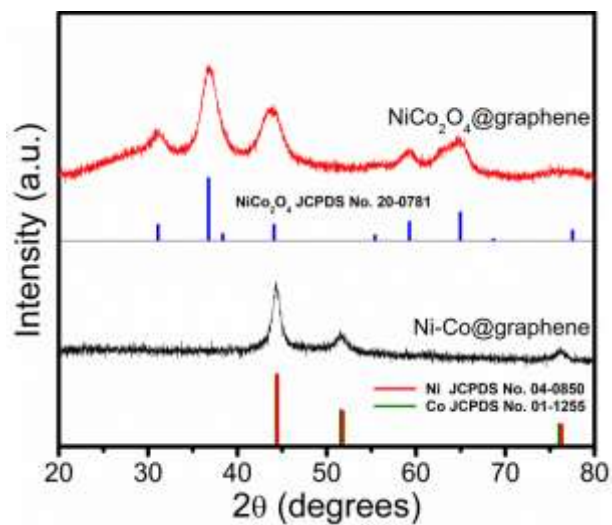

**Fig. S12** XRD patterns of Ni-Co@graphene and NiCo<sub>2</sub>O<sub>4</sub>@graphene nanorods.

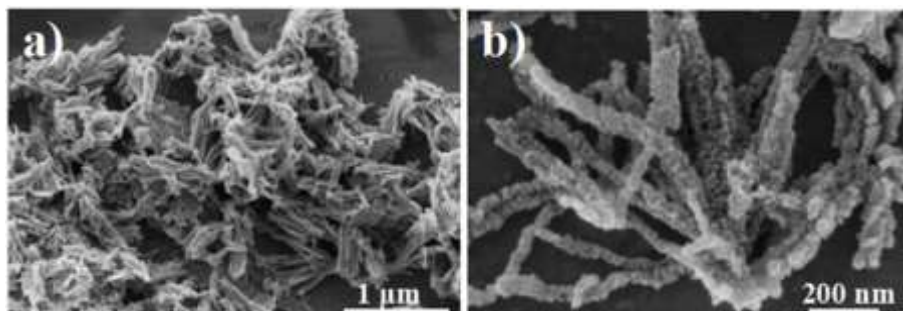

**Fig. S13** SEM images of Ni-Co@graphene.

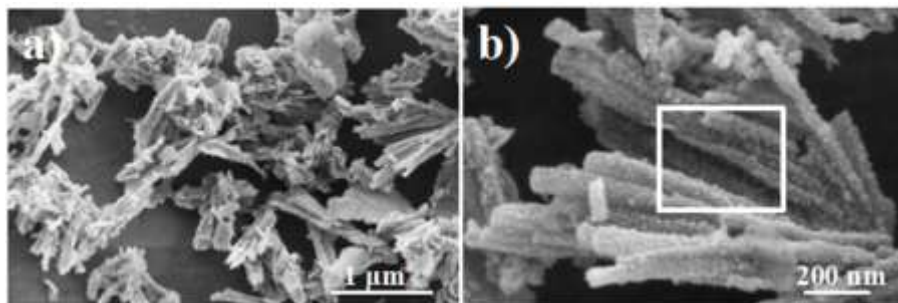

**Fig. S14** SEM images of NiCo<sub>2</sub>O<sub>4</sub>@graphene nanorods.

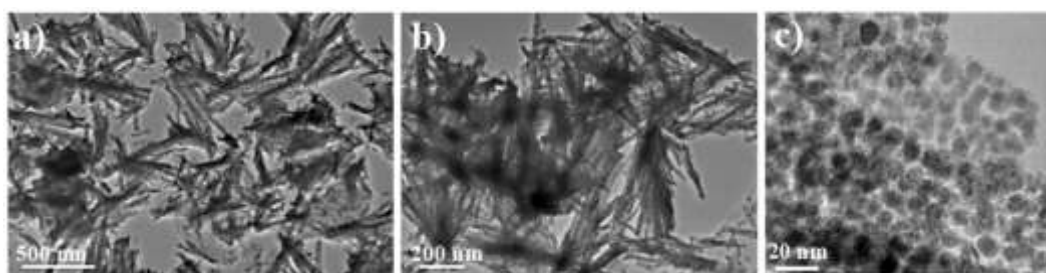

**Fig. S15** a), b) TEM images and c) HRTEM image of NiCo<sub>2</sub>O<sub>4</sub>@graphene nanorods.

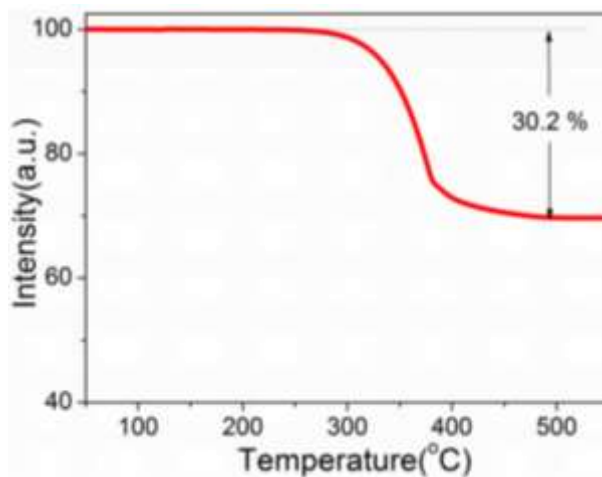

**Fig. S16** TGA curve of NiCo<sub>2</sub>O<sub>4</sub>@graphene nanorods.

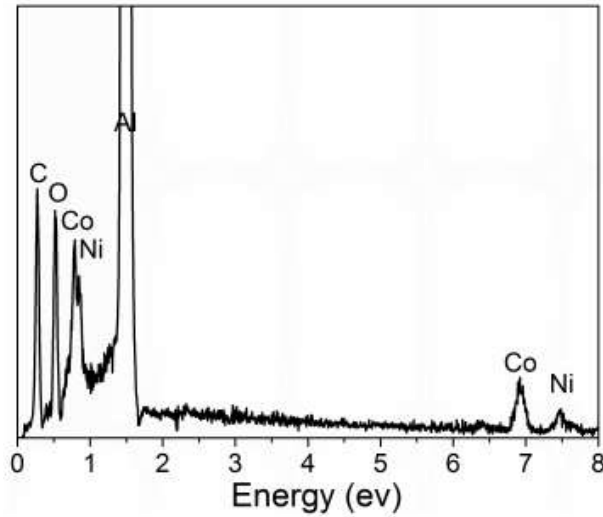

**Fig. S17** EDX spectrum of the area in the white square of Fig. S13b.

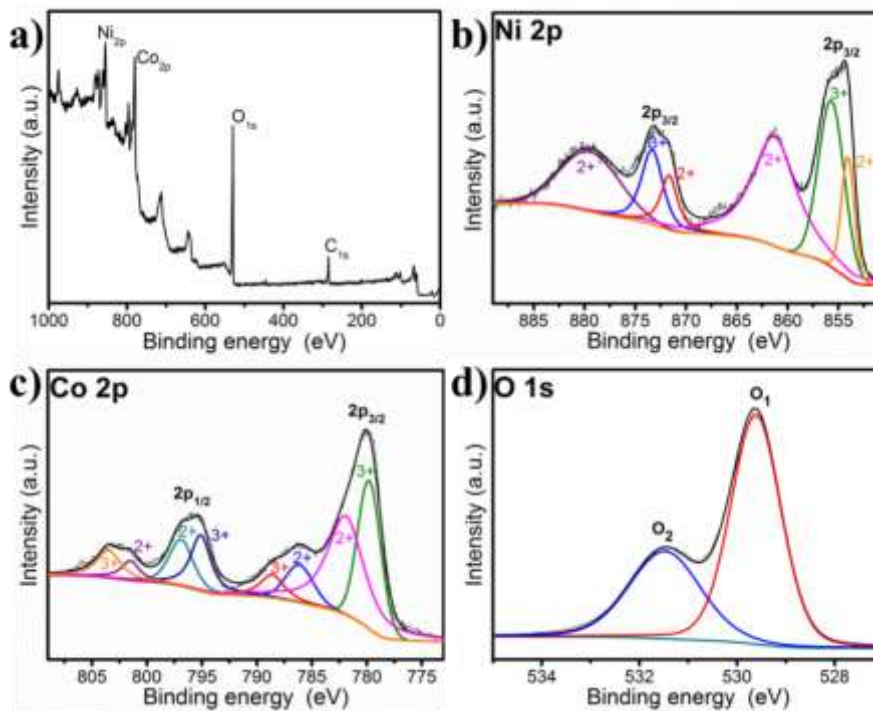

**Fig. S18** a) Survey XPS spectrum and high-resolution XPS spectrum for the b) Ni 2p, c) Co 2p and d) O 1s region of the NiCo<sub>2</sub>O<sub>4</sub>@graphene nanorods.

The Ni 2p spectra (Fig. S18b) confirms the presence of Ni<sup>2+</sup> and Ni<sup>3+</sup>, the peaks at 854.2 and 871.9 eV are indexed to Ni<sup>2+</sup>, while other peaks at 855.6 and 873.6 eV are associated with Ni<sup>3+</sup>. Likewise, Co 2p spectra reveals two types of Co species can be observed in the Fig. S17c. The peaks at 780.5 and 796.0 eV are assigned to Co<sup>2+</sup>, while other peaks at 779.3 and 794.0 eV are belonged to Co<sup>3+</sup>, which is in good accord with the previous results. The peaks

of O 1 (Fig. S18d) at 529.3 eV and O 2 at 530.8 eV are ascribed to the metal-oxygen and some adefect sites with low oxygen coordination. These results show that the chemical composition of NiCo<sub>2</sub>O<sub>4</sub>@graphene nanorods contain Ni<sup>2+</sup>, Ni<sup>3+</sup>, Co<sup>2+</sup> and Co<sup>3+</sup>, which are in good agreement with the results in the literature for NiCo<sub>2</sub>O<sub>4</sub>.

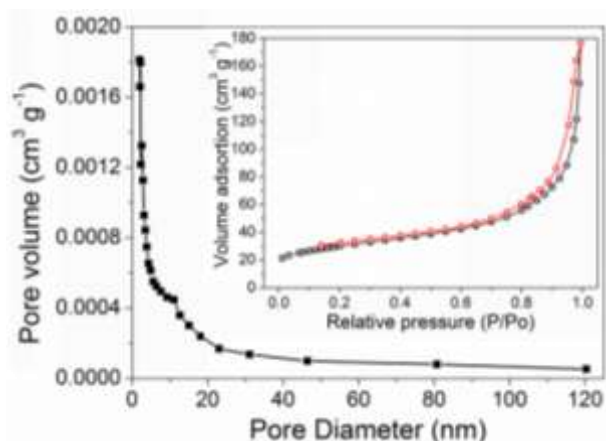

**Fig. S19** Pore-size distribution and nitrogen adsorption-desorption isotherms (inset) of NiCo<sub>2</sub>O<sub>4</sub>@graphene nanorods.

The porosity of NiCo<sub>2</sub>O<sub>4</sub>@graphene nanorods could be verified by Brunauer-Emmett-Teller (BET) measurements. From the N<sub>2</sub> adsorption/desorption isotherm shown in the inset of Fig. S19, a reversible N<sub>2</sub> hysteresis loop in the range 0.8-1.0 p/p<sub>0</sub> was observed with typical type IV sorption behavior, suggesting the unique characteristic of a mesoporous microstructure of the NiCo<sub>2</sub>O<sub>4</sub>@graphene nanorods. Based on the that, the specific surface area and the pore volume of the NiCo<sub>2</sub>O<sub>4</sub>@graphene nanorods are calculated to be 105.3 m<sup>2</sup> g<sup>-1</sup> and 0.26 cm<sup>3</sup> g<sup>-1</sup>, respectively. Such a mesoporous NiCo<sub>2</sub>O<sub>4</sub>@graphene nanorods with the high surface areas and porous characteristics can facilitate the sufficient penetration of electrolyte and the fast transport of Li<sup>+</sup> as well as buffer the volume variation of NiCo<sub>2</sub>O<sub>4</sub> nanoparticles, thus leading to high specific capacity and excellent cycling stability of the electrodes.



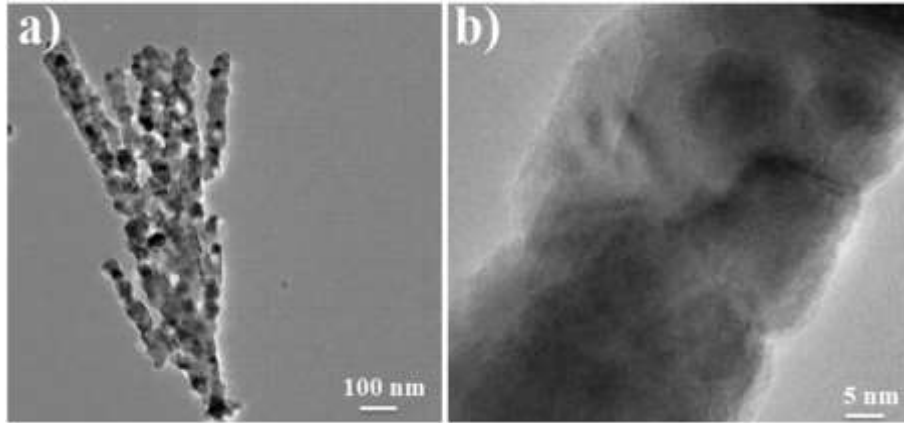

**Fig. S20** a) TEM and b) HRTEM images of bare NiCo<sub>2</sub>O<sub>4</sub> nanorods.

For comparison and demonstrating the internal distribution of NiCo<sub>2</sub>O<sub>4</sub> phase in the porous NiCo<sub>2</sub>O<sub>4</sub>@graphene nanorods composites, the original ZIF-67@Ni-BTC nanorods were directly heating at 500 °C for 3 h in air to obtain the bare NiCo<sub>2</sub>O<sub>4</sub> nanorods without carbon shells. After removing carbon matrix, the bare NiCo<sub>2</sub>O<sub>4</sub> nanorods also inherited the general appearance of ZIF-67@Ni-BTC nanorods, and a large number of NiCo<sub>2</sub>O<sub>4</sub> nanoparticles stacked into a 1D porous NiCo<sub>2</sub>O<sub>4</sub> nanostructure.

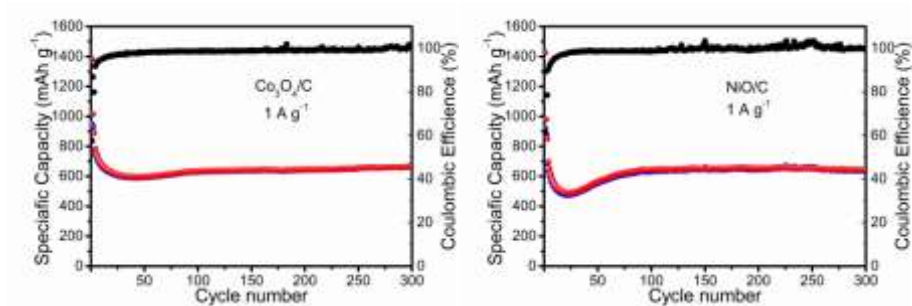

**Fig. S21** The cycling performance and Coulombic efficiencies of Co<sub>3</sub>O<sub>4</sub>/C and NiO/C at 1 A g<sup>-1</sup>.

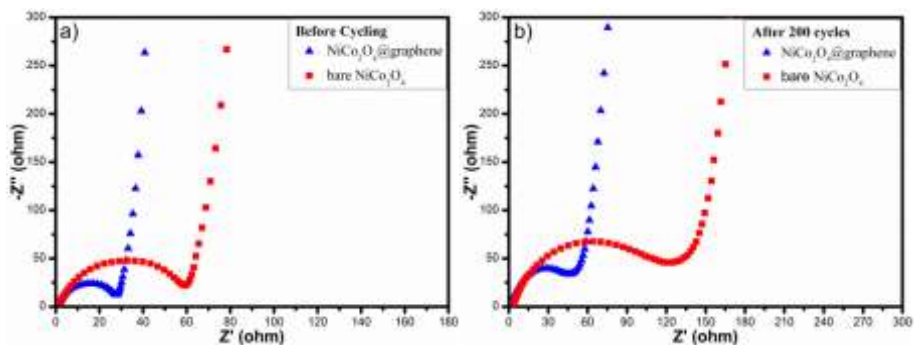

**Fig. S22** Nyquist plots of the NiCo<sub>2</sub>O<sub>4</sub>@graphene and bare NiCo<sub>2</sub>O<sub>4</sub> a) before cycling and b) after the 200th cycle with a fully charged state.

Electrochemical impedance spectroscopy (EIS) measurements of the two electrodes were carried out to explain the superior electrochemical properties of the NiCo<sub>2</sub>O<sub>4</sub>@graphene composite compared with that of the bare NiCo<sub>2</sub>O<sub>4</sub>. The Nyquist plots obtained before and after 200 cycles are shown in Fig. S22. The resulting Nyquist plots all displayed a semicircle in the medium frequency region, which can be assigned to the charge-transfer resistance, followed by a slop line. Before cycling, the two electrodes show almost the same semicircle meaning similar charge-transfer resistances while with different increasing after cycling, as shown in Fig. S22a. For the NiCo<sub>2</sub>O<sub>4</sub>@graphene electrode, the slightly increased semicircle diameter (30 to 45 ohm) indicates its good stability during cycling. In contrast, the semicircle diameter for the bare NiCo<sub>2</sub>O<sub>4</sub> electrode increased about one time after cycling, which mainly due to the cycling-induced structural degradation. This suggests that the graphene coating significantly facilitated the electron transfer and Li<sup>+</sup> ions diffusion and maintained the structure integrity during cycling.

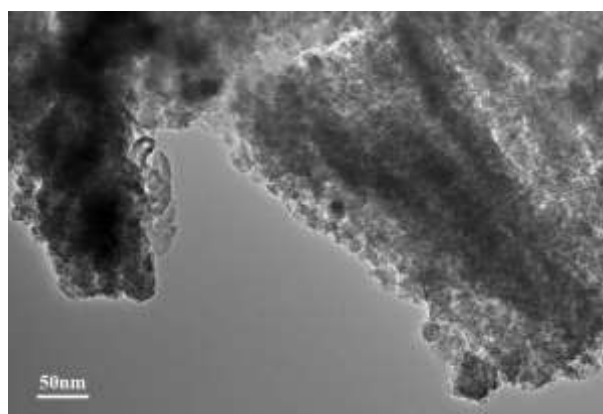

**Fig. S23** TEM image of the NiCo<sub>2</sub>O<sub>4</sub>@graphene electrode after 1200 cycles at 500 mA g<sup>-1</sup>.

**Table S1** The ratio of C, O, Ni and Co in the NiCo<sub>2</sub>O<sub>4</sub>@graphene nanorods based on the XPS result.

| Sample | C (wt%) | O (wt%) | Co (wt%) | Ni (wt%) |
|--------|---------|---------|----------|----------|
|--------|---------|---------|----------|----------|

|                                            |      |      |      |      |
|--------------------------------------------|------|------|------|------|
| NiCo <sub>2</sub> O <sub>4</sub> /graphene | 30.3 | 23.8 | 30.5 | 15.4 |
|--------------------------------------------|------|------|------|------|

**Table S2** Electrochemical performance of different NiCo<sub>2</sub>O<sub>4</sub>-based electrodes

| Type of NiCo <sub>2</sub> O <sub>4</sub>                 | Initial discharge capacity (mAh g <sup>-1</sup> ) | Rate performance (mAh g <sup>-1</sup> ) | Capacity retention after cycling                         | Reference        |
|----------------------------------------------------------|---------------------------------------------------|-----------------------------------------|----------------------------------------------------------|------------------|
| NiCo <sub>2</sub> O <sub>4</sub> -RGO                    | 1351 at 100 mA g <sup>-1</sup>                    | 396 at 0.8 A g <sup>-1</sup>            | ~65% after 110 cycles at 200 mA g <sup>-1</sup>          | S1               |
| NiCo <sub>2</sub> O <sub>4</sub> @ Au NTs                | 1310 at 100 mA g <sup>-1</sup>                    | 349 at 5 A g <sup>-1</sup>              | ~69% after 200 cycles at 100 mA g <sup>-1</sup>          | S2               |
| NiCo <sub>2</sub> O <sub>4</sub> nanoflakes              | 1292 at 500 mA g <sup>-1</sup>                    | ~780 at 2 A g <sup>-1</sup>             | ~62.5% after 100 cycles at 800 mA g <sup>-1</sup>        | S3               |
| NiCo <sub>2</sub> O <sub>4</sub> NWAs                    | 1291 at 100 mA g <sup>-1</sup>                    | 810 at 1 A g <sup>-1</sup>              | ~72% after 50 cycles at 500 mA g <sup>-1</sup>           | S4               |
| NiCo <sub>2</sub> O <sub>4</sub> mesoporous microspheres | 1680 at 100 mA g <sup>-1</sup>                    | 393 at 1.6 A g <sup>-1</sup>            | ~58.7% after 500 cycles at 800 mA g <sup>-1</sup>        | S5               |
| flower-like NiCo <sub>2</sub> O <sub>4</sub>             | 1280 at 150 mA g <sup>-1</sup>                    | ~420 at 2 A g <sup>-1</sup>             | ~55% after 60 cycles at 500 mA g <sup>-1</sup>           | S6               |
| <b>NiCo<sub>2</sub>O<sub>4</sub>@ graphene nanorods</b>  | <b>1303 at 500 mA g<sup>-1</sup></b>              | <b>505 at 4 A g<sup>-1</sup></b>        | <b>83.5% after 1200 cycles at 1000 mA g<sup>-1</sup></b> | <b>This work</b> |

S1. Y. Chen, M. Zhuo, J. Deng, Z. Xu, Q. Li and T. Wang, *J. Mater. Chem. A*, 2014, **2**, 4449-4456.

S2. J. Zhu, Z. Xun and B. Lu, *Nano Energy*, 2014, **7**, 114-123.

S3. A. K. Mondal, D. Su, S. Chen, X. Xie and G. Wang, *ACS Appl. Mater. Interfaces*, 2014, **6**, 14827-14835.

S4. X. Zhou, G. Chen, J. Tang, Y. Ren and J. Yang, *J. Power Sources*, 2015, **229**, 97-103.

S5. J. Li, S. Xiong, Y. Liu, Z. Ju and Y. Qian, *ACS Appl. Mater. Interfaces*, 2013, **5**, 981-988.

S6. L. Li, Y. Cheah, Y. Ko, P. Teh, G. Wee, C. Wong, S. Peng and M. Srinivasan, *J. Mater. Chem. A*, 2013, **1**, 10935-10941.
